# Supplementary material for: Increased Risk of Severe Hypoglycemic Events with Increasing Frequency of Non-severe Hypoglycemic Events in Patients with Type 1 and Type 2 Diabetes
Source: Springer Nature journal article supplement (doi:10.1007/s13300-014-0075-x), 2014-07-14
Supplement: MOESM1 [file 9263250]

- The association between severe hypoglycemic events (SHEs) and non-severe hypoglycemic events (NSHEs) is not well explored.
- This observational study of people with type 1 or type 2 diabetes represents the largest study to date (>20,000 patients) examining the co-occurrence of SHEs and NSHEs in routine clinical practice in insulin-treated patients.
- This study is unique in the systematic way in which NSHEs were recorded.
- Despite adjustment for potential confounders, there was a strong, independent, and statistically significant association between frequency of NSHEs and SHEs in people with type 1 and type 2 diabetes.
- These data further support the importance of obtaining an accurate record of patients' hypoglycemic experience during consultations, as there is a strong clinical and economic rationale for reducing the frequency of hypoglycemic events, regardless of severity.

This summary slide represents the opinions of the authors. This study and the article processing charges were sponsored by Novo Nordisk. The authors are grateful to Gary Patronek and Mark Nelson of Watermeadow Medical (supported by Novo Nordisk) for writing assistance and submission assistance. For a full list of acknowledgments and conflicts of interest for all authors of this article, please see the full text online. Copyright © The Author(s) 2014. Creative Commons Attribution Noncommercial License (CC BY-NC).
